# Supplementary material
Source: publisher site journal article supplement (https://www.spandidos-publications.com/3519/downloadSupplementary)
Supplement: Supplementary file 1 [file downloadSupplementary]

Figure S1. Western blot analysis of EGFR expression. Protein fold change is displayed as the ratio of the EGFR protein band to the  $\beta$ -actin protein band. \* $P < 0.05$  vs. mock. sh, short hairpin; mock, shRNA control vector.

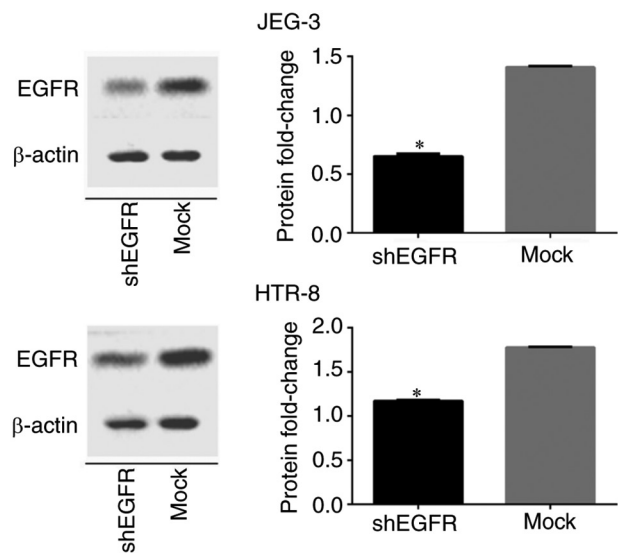

1 Figure S2. HBx protein promotes degradation of Smc5/6 to enhance HBV replication in placental trophoblast cells. HBx protein 61  
 2 expression is upregulated by increasing HBV replication. HBx protein also activates EGFR expression by acting on the EGFR 62  
 3 promoter and inhibits trophoblast cell apoptosis through the downstream signalling pathway PI3K/p-AKT. HBx, hepatitis B 63  
 4 virus X; Smc5, structural maintenance of chromosomes 5; HBV, hepatitis B virus; pg, pregenomic; ccc, covalently closed circular. 64

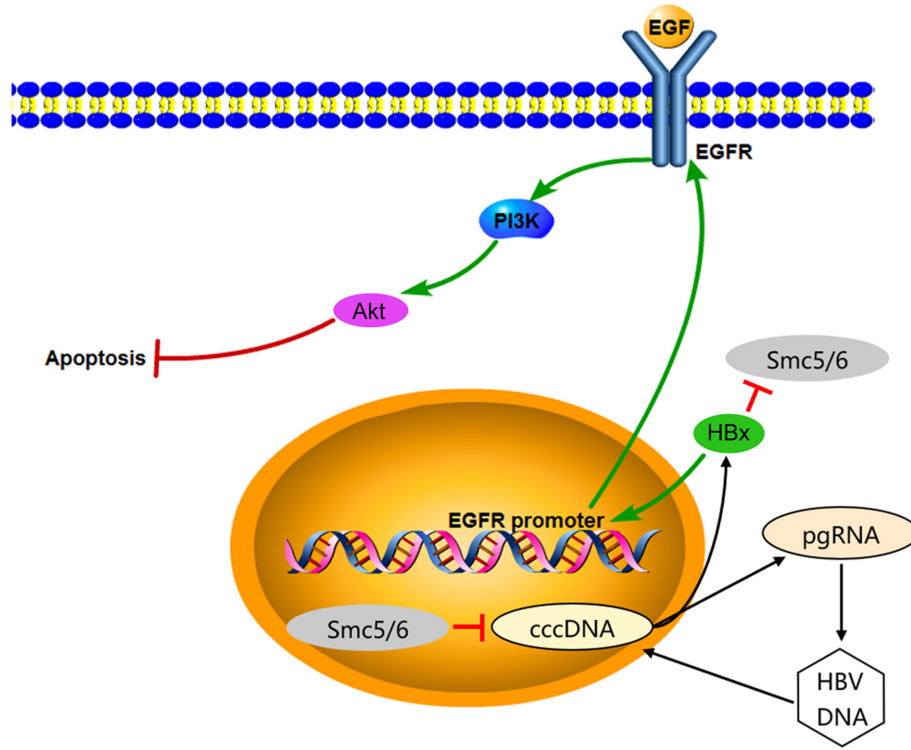

5  
6  
7  
8  
9  
10  
11  
12  
13  
14  
15  
16  
17  
18  
19  
20  
21  
22  
23  
24  
25  
26  
27  
28  
29  
30  
31  
32  
33  
34  
35  
36  
37  
38  
39  
40  
41  
42  
43  
44  
45  
46  
47  
48  
49  
50  
51  
52  
53  
54  
55  
56  
57  
58  
59  
60

61  
62  
63  
64  
65  
66  
67  
68  
69  
70  
71  
72  
73  
74  
75  
76  
77  
78  
79  
80  
81  
82  
83  
84  
85  
86  
87  
88  
89  
90  
91  
92  
93  
94  
95  
96  
97  
98  
99  
100  
101  
102  
103  
104  
105  
106  
107  
108  
109  
110  
111  
112  
113  
114  
115  
116  
117  
118  
119  
120
